# The American Journal of Psychiatry

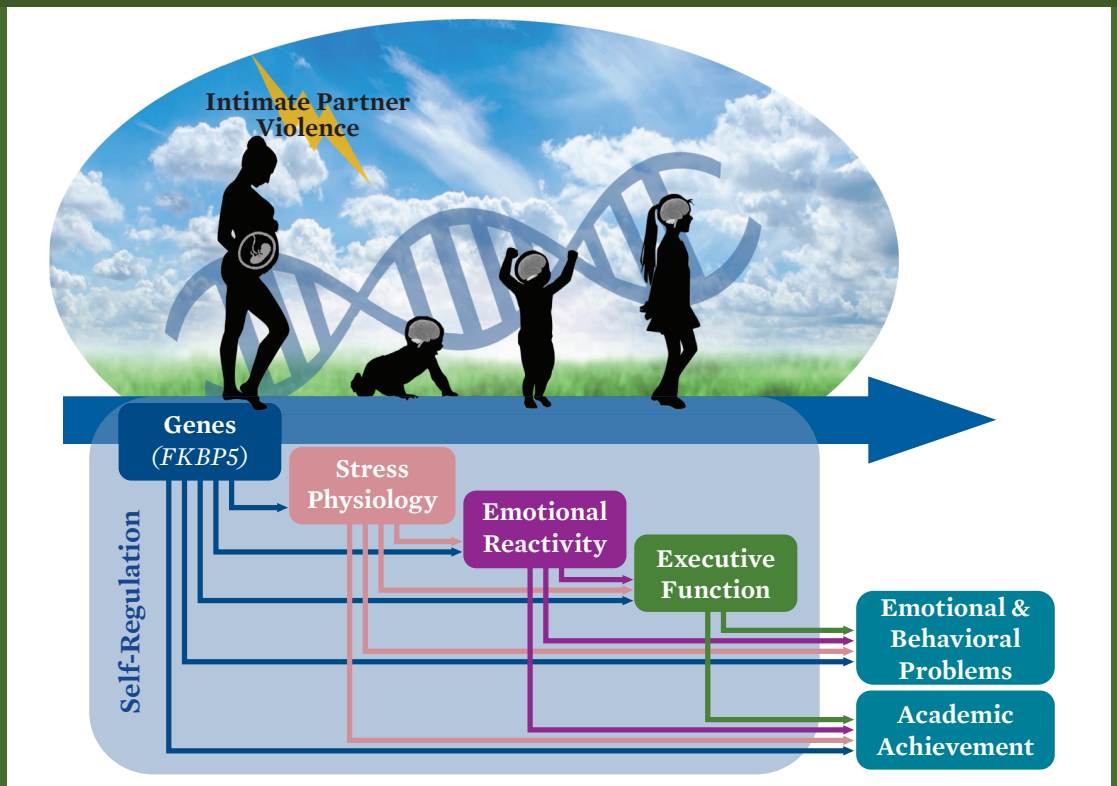

Psychiatric Genetics Begins to Find Its Footing

Neurobiology of Self-Regulation: Longitudinal Influence of *FKBP5* and Intimate Partner Violence on Emotional and Cognitive Development in Childhood

Polygenic Risk: Predicting Depression Outcomes in Clinical and Epidemiological Cohorts of Youths

Identifying Novel Types of Irritability Using a Developmental Genetic Approach
