

# NUHS

National University  
Health System

## Shaping medicine for the future

**Join us at the cutting edge of medical innovation**

### **Head, Department of Psychological Medicine, National University Hospital (NUH) and National University of Singapore, Yong Loo Lin School of Medicine (NUS Medicine)**

Established in 1979, the Department of Psychological Medicine, NUH & NUS Medicine, provides quality inpatient and outpatient psychiatric clinical care for the general population of Singapore. The department prides itself on the academic research faculty and clinicians who work to advance the vision of the NUH's University Medicine Cluster and NUS Medicine, of which the department is a part. The vision and strategic development affirm the diverse scope, past achievements, and distinct career paths of the department's multi-disciplinary faculty and also provides the rationale for future growth. The department excels in psychiatric teaching and training for undergraduate and post-graduate students. A strong emphasis is also placed on research as an important means to further their knowledge in the field.

NUH and NUS Medicine are part of the National University Health System (NUHS) which includes three tertiary, acute and community hospitals, three National Specialty Centres, the National University Polyclinics (NUP), Jurong Medical Centre; and three NUS health sciences schools in Medicine & Nursing, Dentistry and Public Health. As a Regional Health System, NUHS works closely with health and social care partners across Singapore to develop and implement programmes that contribute to a healthy and engaged population in the Western part of Singapore. For more information, please visit [www.nuhs.edu.sg](http://www.nuhs.edu.sg).

The Head of Department will be responsible for developing the vision and strategic goals of the department to integrate clinical service, research and education, to drive the implementation of the department's initiatives and contribute to the overall vision and goals of NUH, NUS Medicine and NUHS. The Head of Department will be accountable to the Senior Management of NUH, NUS Medicine and NUHS for the overall administration and compliance of the department with the operational policies and guidelines set by the NUH and NUS Medicine.

**The candidate should possess (but not limited to) the following qualifications, experience and qualities:**

- Registered Specialist with Singapore Medical Council with a recognised postgraduate qualification such as Master of Medicine or relevant qualification in Psychological Medicine. For overseas applicants, appointment will be subject to approval from Ministry of Health and Singapore Medical Council.
- Nationally, regionally or internationally recognised with good professional standings and possess an established record in academic activities, where appropriate for the position.
- Experience in leading a team and planning for clinical, educational or research initiatives/development, with a track record of leadership and/or high level of participation at national committees, regional/international expert or professional societies.
- Advocate NUHS values of teamwork, respect, integrity, compassion, excellence and patient-centeredness with values of accountability and service before self with strong commitment to caring for and development of staff in the department.
- At least 2 years of clinical experience at specialist level.

If you are keen to apply, please submit a detailed CV including the contact details of your 6 appointed character referees (name, designation, institution's name and email address) and a write-up on your vision and a 3-year strategic plan (comprising NUHS 3 missions – Clinical, Education and Research development) for the Department of Psychological Medicine, NUH & NUS Medicine to:

**Ms Clara Wee [Chief Human Resource Officer, National University Hospital, NUHS Tower Block, Level 6]  
E-mail: [clara\\_wee@nuhs.edu.sg](mailto:clara_wee@nuhs.edu.sg)**

**Closing Date: 30 August 2019**

Shape the future of global biomedical healthcare. Challenge yourself to take the lead. Drive a new beginning with NUHS.

# EDITOR'S CHOICE

## Psychiatric Services

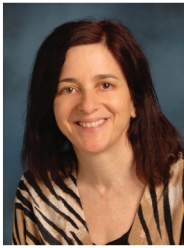

Collections curated by Lisa B. Dixon, M.D., M.P.H., and the Early-Career Psychiatrist Advisory Committee

Lisa B. Dixon, M.D., M.P.H.

Each collection will focus on one topic—summarizing for the researcher, clinician, and policy analyst the latest information and seminal research available from *Psychiatric Services*.

- Recovery
- Peer Support
- Perinatal Psychiatry
- Homelessness
- Mental health disparities, by race-ethnicity

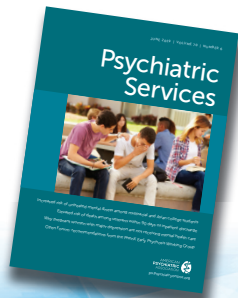

Sign up for Editor's Choice alert at <http://appi.org/etocs>.

Visit [ps.psychiatryonline.org/editorschoice](http://ps.psychiatryonline.org/editorschoice)

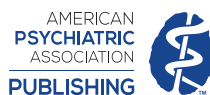

Follow @APAPubPsychSvcs

appi.org • Email: [appi@psych.org](mailto:appi@psych.org) • Toll-Free: 1-800-368-5777

AH1927A

**civilian CORPS**  
★ U.S. Army

**WORLD-CLASS HEALTH CARE**  
**FIRST-RATE BENEFITS**

Practice alongside other highly skilled civilian and military health care providers worldwide, and experience professional opportunities and benefits that can only be found in the Civilian Corps.

- Excellent Federal Benefits
- Potential Recruitment Bonuses
- Flexible Schedules
- Job Security
- Favorable Work Environment
- Worldwide Locations
- 60% of Army Hospital Employees are Civilians
- No Active Duty Military Requirements

U.S. ARMY

Army Medicine Civilian Corps employees are NOT subject to military requirements such as "boot camp," enlistments, or deployments.

FIND JOBS | POST YOUR CV | APPLY TODAY  
**CivilianMedicalJobs.com/AJP**

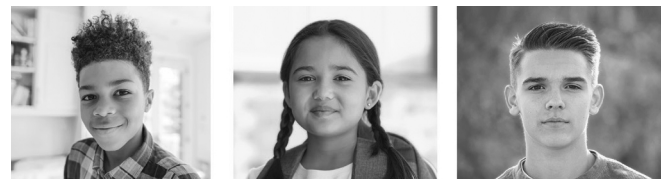

One of these kids didn't try their best.  
**Can you tell which one?**

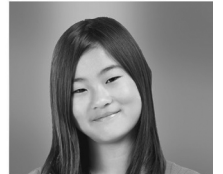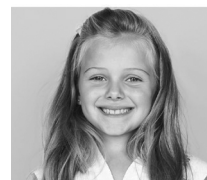

Let the **PdPVTs** give you the confidence to identify valid test performance.

Assess **performance validity** in youth in just **3-5 minutes** with five stand-alone tests

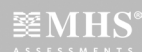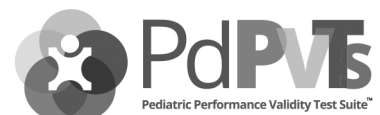

[MHS.com/PdPVTs](http://MHS.com/PdPVTs)

# FREE Online Subscription to *Psychiatric Services* for APA Resident-Fellow Members (RFMs)!

American Psychiatric Association Resident-Fellow Members (RFMs) can receive a free online subscription to *Psychiatric Services*.

Visit [ps.psychiatryonline.org](http://ps.psychiatryonline.org) for full-text access to all of the content in this highly ranked, peer-reviewed monthly journal. *Psychiatric Services* focuses on service delivery in organized systems of care, evolving best practices, and federal and state policies that affect the care of people with mental illnesses.

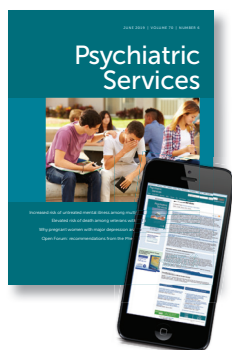

**Please visit [ps.psychiatryonline.org](http://ps.psychiatryonline.org) and log in with your APA username and password.**

Psychiatry residents who are not currently APA Resident-Fellow Members should consider membership in the American Psychiatric Association. The benefits provided to residents are an example of how the APA serves the needs of its members throughout their careers. The low introductory dues APA extends to RFMs are even waived for the first year. Please visit [www.psychiatry.org/join-apa](http://www.psychiatry.org/join-apa) for more information.

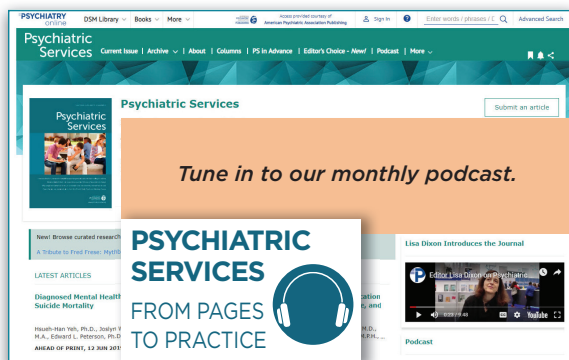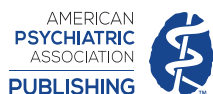

Follow @APAPubPsychSvcs

appi.org • Email: [appi@psych.org](mailto:appi@psych.org) • Toll-Free: 1-800-368-5777

AH1927A

## Psychiatrists

### MINNESOTA

HealthPartners is one of the Upper Midwest's leading multispecialty physician groups. We have practice opportunities for talented, caring BC/BE psychiatrists in metropolitan Minneapolis/St. Paul and central Minnesota.

### Inpatient/Adult

- **Regions Hospital (St. Paul, MN)**

Our state-of-the-art inpatient psychiatric facilities allow our team of psychiatrists, residents, therapists, social workers, NPs/PAs and nursing staff to provide exceptional care to adult psychiatric inpatients. Our Regions care model schedule is 7 days on/7 days off.

### Outpatient/Adult

- **Central Minnesota (Sartell/St. Cloud)**

- **Metropolitan Minneapolis/St. Paul**

These teams provide integrated outpatient mental health services in our primary care and outpatient specialty clinics located within a variety of urban, suburban and semi-rural communities. Full-time or part-time practices are available. No hospital call responsibilities.

In addition to competitive salaries, HealthPartners offers an excellent benefits package, including an employer-matched 401(k) and 457(b), generous personal time off, malpractice insurance coverage, and more.

Let us tell you more! Please forward your CV and cover letter to: [lori.m.fake@healthpartners.com](mailto:lori.m.fake@healthpartners.com), apply online at [healthpartners.com/careers](http://healthpartners.com/careers), or call 800-472-4695 x1. EOE

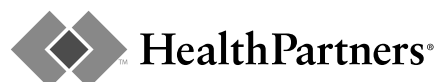

*Ariella, an artist, musician, and real person living with schizophrenia*

SCHIZOPHRENIA  
DIAGNOSIS

EXPERIENCED  
SIDE EFFECTS

STARTED  
COLLEGE

STARTED  
MEDICATION

STOPPED  
MEDICATION

G  
R  
A  
D  
U  
A  
T  
I  
O  
N

# Schizophrenia shouldn't derail her life

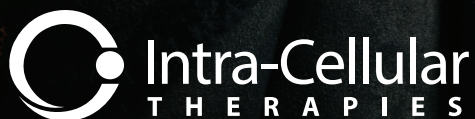

BUILT ON NOBEL PRIZE-WINNING SCIENCE

Visit [SZJourney.com](http://SZJourney.com) to learn more
